# Supplementary material
Source: MDPI journal article supplement (https://www.mdpi.com/2306-5710/4/3/53)
Supplement: s1 [file s1]

Table S1. Factor loadings of each descriptor in the principal components analysis for the principal components one and two (PC1 and PC2).

| Descriptor | PC1 | PC2 |
| --- | --- | --- |
| MaxVol | *0.32* | 0.23 |
| TLTF | *0.33* | 0.16 |
| LTF | *0.31* | 0.23 |
| FDrain | -0.19 | -0.20 |
| SmBubb | 0.28 | -0.04 |
| MedBubb | 0.26 | -0.17 |
| LgBubb | 0.28 | -0.12 |
| L | *-0.28* | *0.32* |
| a | 0.31 | -0.20 |
| b | -0.24 | *-0.33* |
| RI | 0.22 | *-0.43* |
| GI | *-0.31* | 0.11 |
| BI | 0.06 | *0.51* |
| CO2 | 0.23 | 0.09 |
| OH | -0.05 | -0.25 |

Abbreviations: MaxVol = maximum volume of foam, TLTF = total lifetime of foam, LTF = lifetime of foam, FDrain = foam drainage, L, a, b = color in CIELab scale, RI, GI, BI indices of color in RGB scale, SmBubb = small bubbles, MedBubb = medium bubbles, LgBubb = large bubbles, OH = alcohol gas and CO2 = carbon dioxide release.
